# Supplementary material for: Differences and Similarities between Front-of-Pack Nutrition Labels in Europe: A Comparison of Functional and Visual Aspects
Source: Nutrients. 2019 Mar 14;11(3):626. doi: 10.3390/nu11030626 (PMC6471039; doi:10.3390/nu11030626)
Supplement: Supplementary file 1 [file nutrients-11-00626-s001.pdf]

## Supplementary materials:

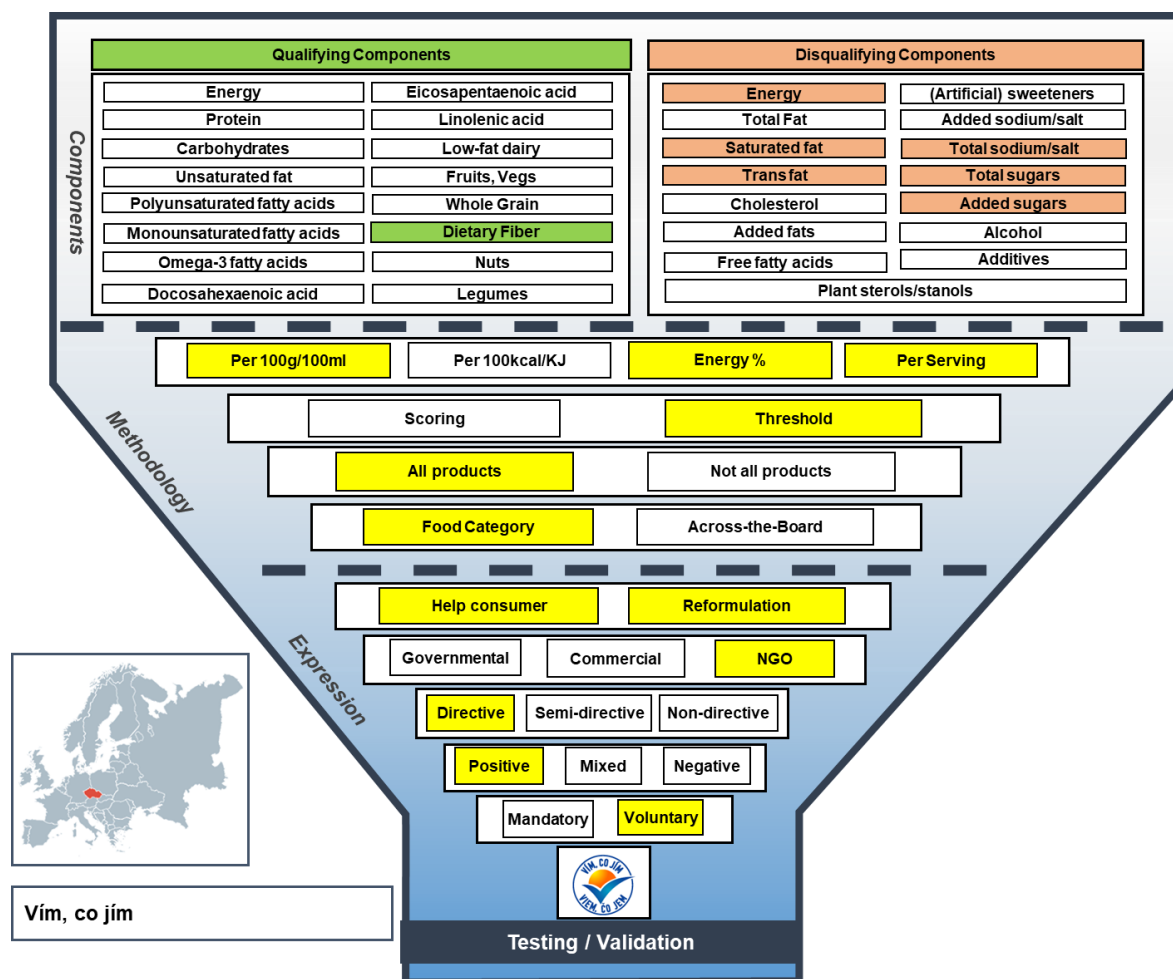

**Figure S1.** Characteristics of Czech Choices label 'Vim, co jím' shown in the Funnel Model.

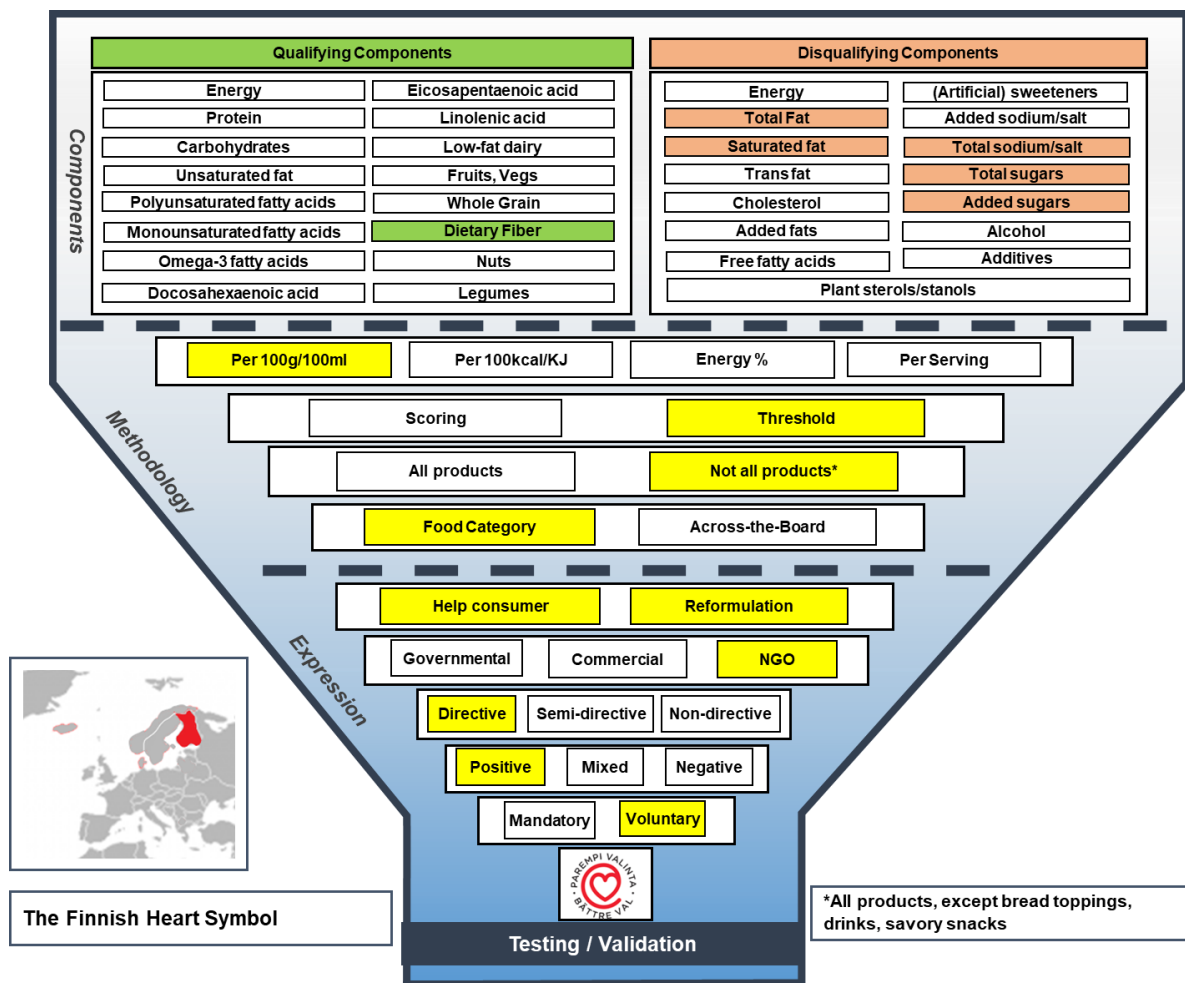

**Figure S2.** Characteristics of the Finnish Heart label shown in the Funnel Model.

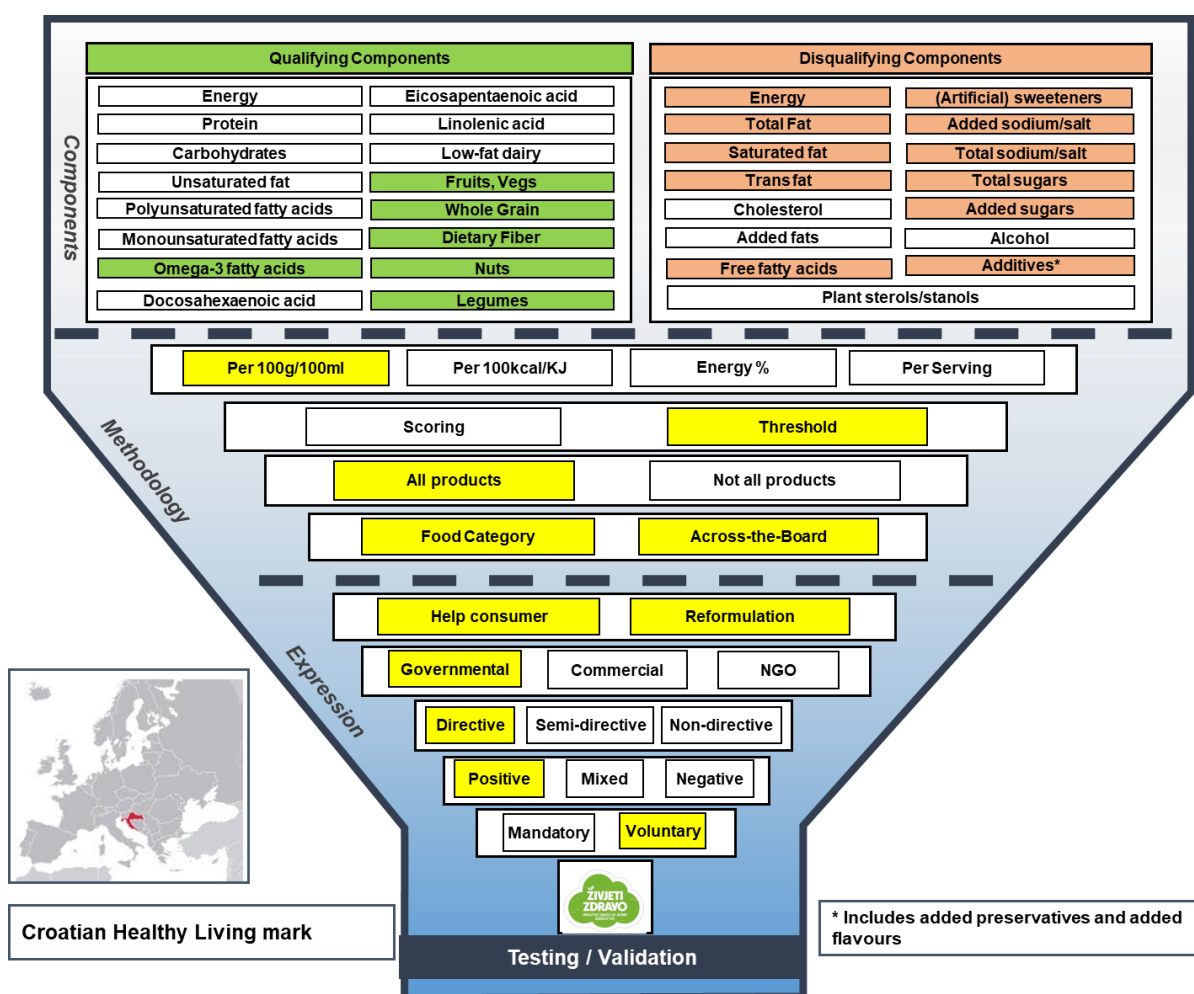

**Figure S3.** Characteristics of the Croatian Healthy Living (HL) label shown in the Funnel Model.

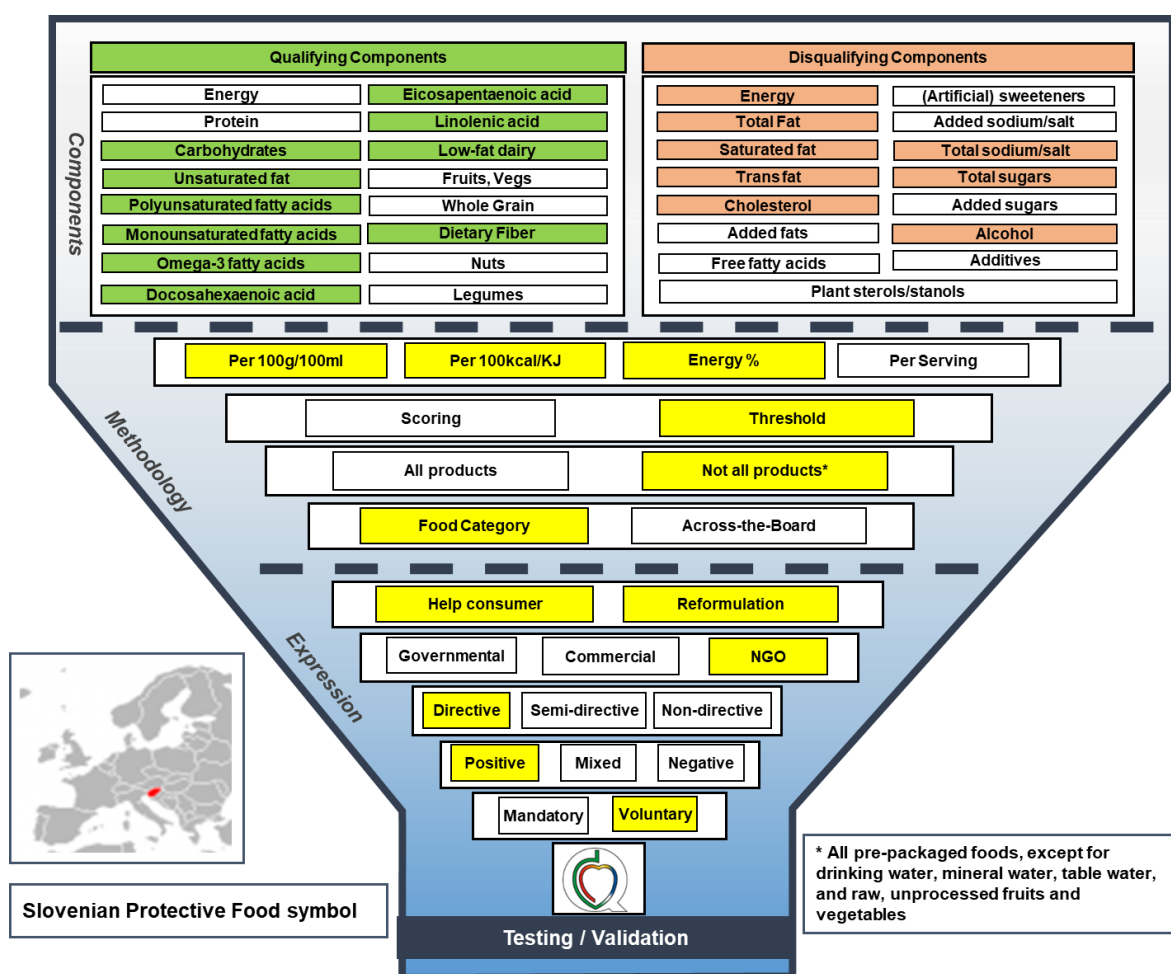

**Figure S4.** Characteristics of the Slovenian Protective Food (PF) label shown in the Funnel Model.

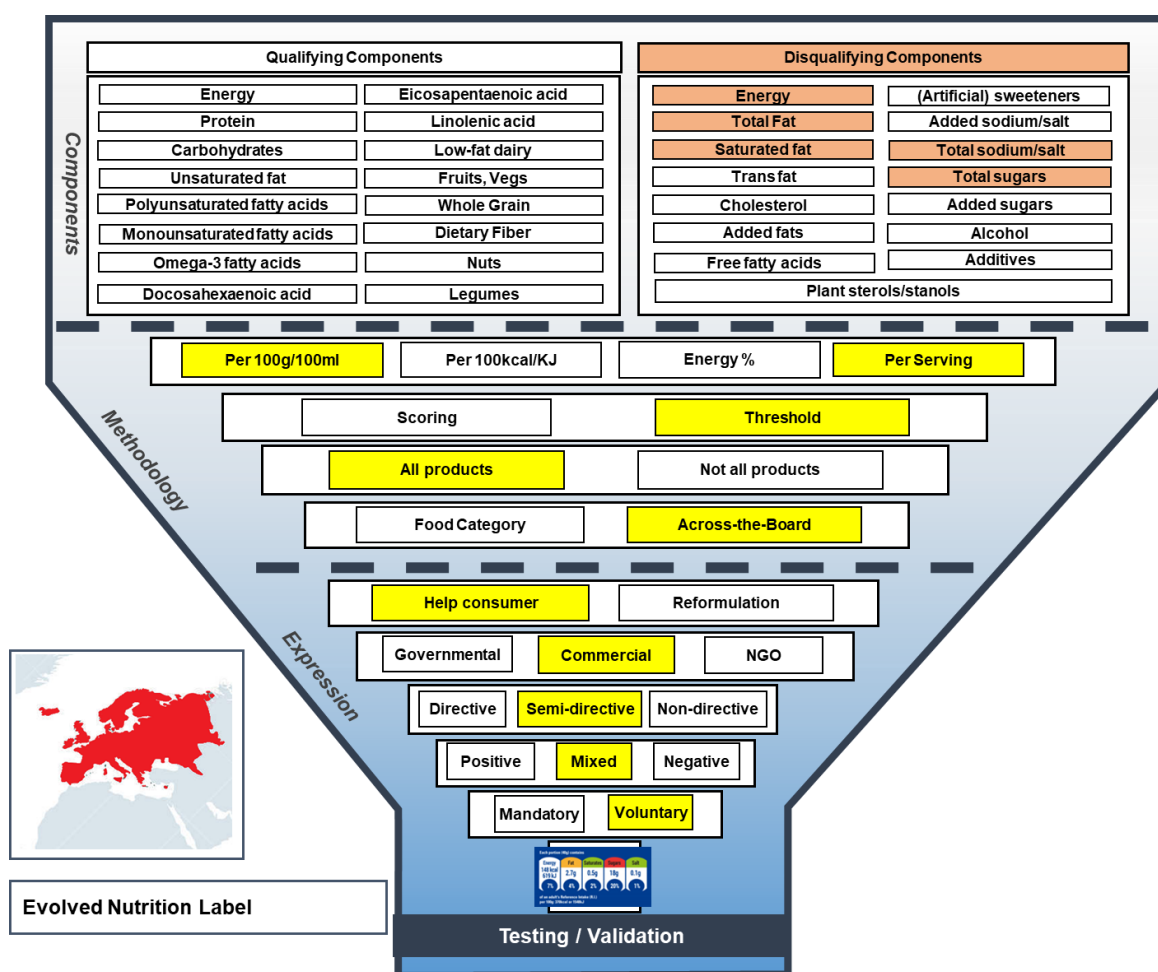

**Figure S5.** Characteristics of the Evolved Nutrition Label (ENL) shown in the Funnel Model.

**Table S1.** Qualifying and disqualifying components used in positive front-of-pack (FOP) labelling systems in Europe.

|                                    | Choices | Vim, co jim | Keyhole | Finnish Heart | Croatian Healthy Living | Slovenian Protective Food |
|------------------------------------|---------|-------------|---------|---------------|-------------------------|---------------------------|
| Qualifying components              |         |             |         |               |                         |                           |
| Energy                             | -       | -           | X       | -             | -                       | -                         |
| Carbohydrates                      | -       | -           | -       | -             | -                       | X                         |
| Unsaturated fat                    | -       | -           | -       | -             | -                       | X                         |
| Monounsaturated fatty acids (MUFA) | -       | -           | -       | -             | -                       | X                         |
| Polyunsaturated fatty acids (PUFA) | -       | -           | -       | -             | -                       | X                         |
| Omega-3 fatty acids (W-3)          | -       | -           | -       | -             | X                       | X                         |
| Eicosapentaenoic acid (EPA)        | -       | -           | -       | -             | -                       | X                         |

|                            |   |   |   |   |   |   |
|----------------------------|---|---|---|---|---|---|
| Docosahexaenoic acid (DHA) | - | - | - | - | - | X |
| Linolenic acids            | - | - | - | - | - | X |
| Low-fat dairy              | - | - | - | - | - | X |
| Fruits & vegetables        | - | - | X | - | X | - |
| Whole grain                | - | - | X | - | X | - |
| Dietary fibre              | X | X | X | X | X | X |
| Nuts                       | - | - | - | - | X | - |
| Legumes                    | - | - | X | - | X | - |
| Disqualifying components   |   |   |   |   |   |   |
| Energy                     | X | X | X | - | X | X |
| Total fat                  | - | - | X | X | X | X |
| Saturated fat (SFA)        | X | X | X | X | X | X |
| Trans fat (TFA)            | X | X | X | - | X | X |
| Cholesterol                | - | - | - | - | - | X |
| Plant sterols/<br>stanols  | - | - | X | - | - | - |
| Added fats                 | - | - | X | - | - | - |
| (Artificial)<br>sweeteners | - | - | X | - | X | - |
| Total salt/ sodium         | X | X | X | X | X | X |
| Added salt/ sodium         | - | - | - | - | X | - |
| Total sugar                | X | X | X | X | X | X |
| Added sugar                | X | X | X | X | X | - |
| Additives                  | - | - | - | - | X | - |
| Alcohol                    | - | - | - | - | - | X |
| Free fatty acids           | - | - | - | - | X | - |

**Table S2.** Qualifying and disqualifying components used in mixed and negative front-of-pack (FOP) labelling systems in Europe.

|                          | Multiple Traffic<br>Light | Nutriscore | Israeli warning |
|--------------------------|---------------------------|------------|-----------------|
| Qualifying components    |                           |            |                 |
| Protein                  | -                         | X          | -               |
| Fruits & vegetables      | -                         | X          | -               |
| Dietary fibre            | -                         | X          | -               |
| Nuts                     | -                         | X          | -               |
| Legumes                  | -                         | X          | -               |
| Disqualifying components |                           |            |                 |
| Energy                   | X                         | X          | -               |
| Total fat                | X                         | -          | -               |
| Saturated fat (SFA)      | X                         | X          | X               |
| Total sodium/ salt       | X                         | X          | X               |
| Total sugars             | X                         | X          | X               |
